# Supplementary material for: Association between alexithymia and substance use: A systematic review and meta‐analysis
Source: PubMed Central journal article supplement (PMC9790486; doi:10.1111/sjop.12821), 2022-04-18

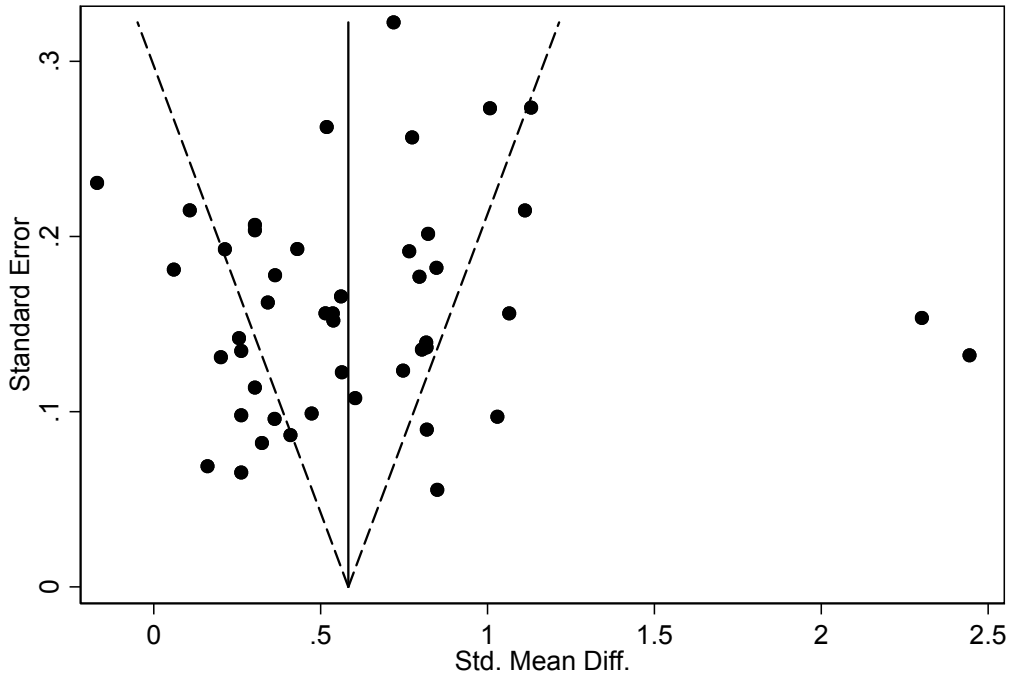

Supplement: SJOP-63-427-s003.pdf [file SJOP-63-427-s003.pdf]
